# Supplementary material for: The influence of Fermi level position at the GaN surface on carrier transfer across the MAPbI3/GaN interface
Source: Royal Society of Chemistry journal article supplement (doi:10.1039/d3cp00801k), 2023-01-01
Supplement: d3cp00801k1.pdf [file d3cp00801k1.pdf]

Electronic Supplementary Information for

***The Influence of Fermi Level Position at the GaN Surface  
on Carrier Transfer across the MAPbI<sub>3</sub>/GaN Interface***

*E. Zdanowicz<sup>1\*</sup>, A. P. Herman<sup>1</sup>, Ł. Przypis<sup>2</sup>, K. Opolczyńska<sup>3,4</sup>, J. Serafińczuk<sup>5,3</sup>, M. Chlipała<sup>6</sup>,  
C. Skierbiszewski<sup>6</sup> and R. Kudrawiec<sup>1,3</sup>*

*<sup>1</sup>Department of Semiconductor Materials Engineering, Wrocław University of Science and  
Technology, Wybrzeże Wyspiańskiego 27, 50-370 Wrocław, Poland*

*<sup>2</sup>Saule Research Institute, Duńska 11, 54-427 Wrocław, Poland*

*<sup>3</sup>Łukasiewicz Research Network – PORT Polish Center for Technology Development,  
Stabłowicka 147, Wrocław 54-066, Poland*

*<sup>4</sup>Institute of Experimental Physics, University of Wrocław, Max Born Square 9, 50-204  
Wrocław, Poland*

*<sup>5</sup>Department of Nanometrology, Wrocław University of Science and Technology,  
Janiszewskiego 11/17, 50-372 Wrocław, Poland*

*<sup>6</sup>Institute of High-Pressure Physics, Polish Academy of Sciences, Sokołowska 29/37, 01-142  
Warszawa, Poland*

*[\\*ewelina.zdanowicz@pwr.edu.pl](mailto:ewelina.zdanowicz@pwr.edu.pl)*

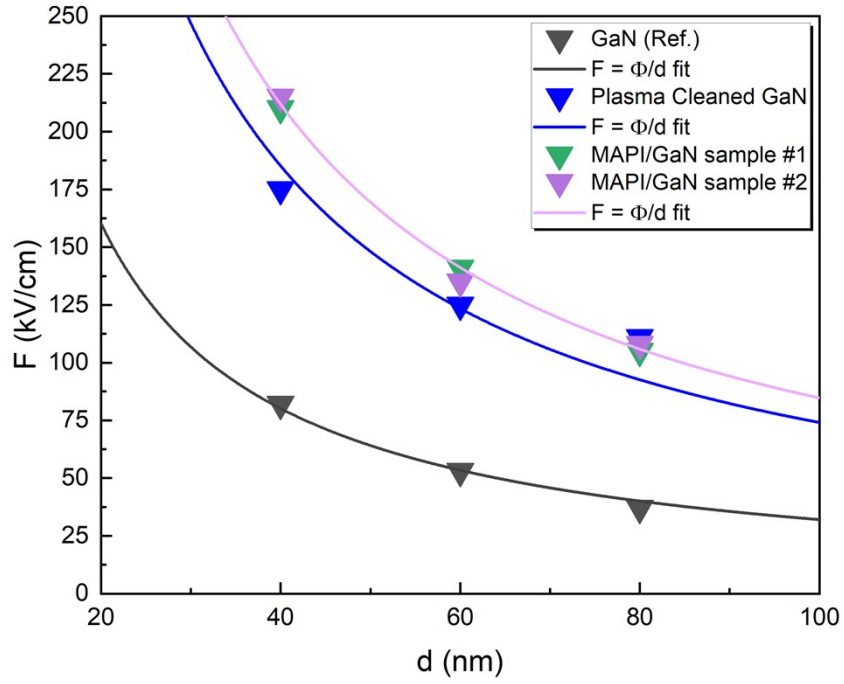

Figure 1 Determination of surface barrier height for uncleaned reference GaN vH, plasma cleaned and two samples of MAPbI<sub>3</sub> covered GaN.

| Sample                  | $\Phi$ (eV)     |
|-------------------------|-----------------|
| GaN (Ref.)              | $0.32 \pm 0.01$ |
| Plasma cleaned GaN      | $0.74 \pm 0.05$ |
| MAPbI <sub>3</sub> /GaN | $0.85 \pm 0.02$ |

Table 1 Surface barrier determined from fitting procedure shown in Figure S1.

Prior to MAPbI<sub>3</sub> deposition vH GaN substrates were plasma cleaned in order to remove organic residues. The influence of such treatment on Fermi level pinning on GaN surface was investigated for n-type GaN vH set of samples. Figure 1 presents values of built-in electric fields obtained for measured samples (uncleaned GaN as a reference, plasma cleaned and two samples of MAPbI<sub>3</sub> covered GaN). Values of surface barrier heights obtained from fitting of built-in electric fields with Eq. 4 (main part of the article) are presented in Table 1. For plasma cleaned GaN surface higher barrier is observed compared to the reference. After MAPbI<sub>3</sub> deposition further increase was found.

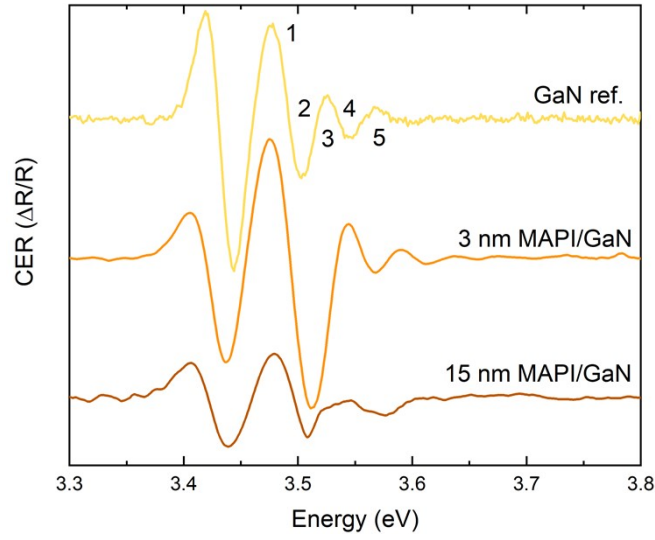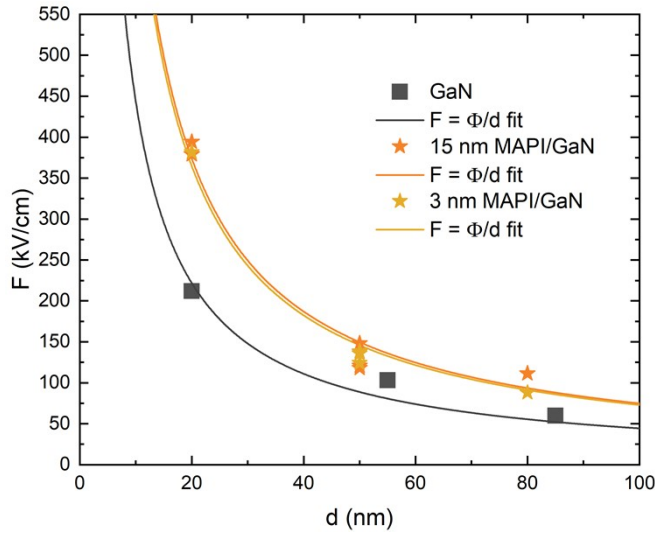

Figure 2 Upper panel: CER spectra of exemplary samples under study. Lower panel: determination of surface barrier for reference vH GaN and set of MAPI/GaN structures with 3 and 15 nm thick MAPI films.

| Sample                        | $\Phi$ (eV)     |
|-------------------------------|-----------------|
| GaN (Ref.)                    | $0.44 \pm 0.03$ |
| 3 nm MAPbI <sub>3</sub> /GaN  | $0.73 \pm 0.02$ |
| 15 nm MAPbI <sub>3</sub> /GaN | $0.75 \pm 0.03$ |

Table 2 Surface barriers obtained for reference GaN vH and 3 nm and 15 nm MAPI/GaN samples.

In order to verify whether observed MAPI-induced increase of surface barrier height at MAPI/GaN interface depends on MAPI film thickness, set of samples containing reference GaN and several samples with 3 and 15 nm thick MAPI films were checked. Upper panel of Figure 2 shows exemplary CER spectra of each sample. Lower panel of Figure 2 shows the fitting procedure for investigated set of samples. As can be noticed, values of built-in electric fields obtained for vH covered with 3 and 15 nm thick MAPI films are in line with each other. This indicates MAPI thickness independent barrier for electrons at MAPI/GaN interface. Table 2 summarizes extracted values of surface barriers.
